# Supplementary material for: Mice in a labyrinth show rapid learning, sudden insight, and efficient exploration
Source: eLife journal article supplement (doi:10.7554/elife.66175), 2021-07-01

**A**

## Entry into the maze

Rewarded animals: Rate of entry into maze

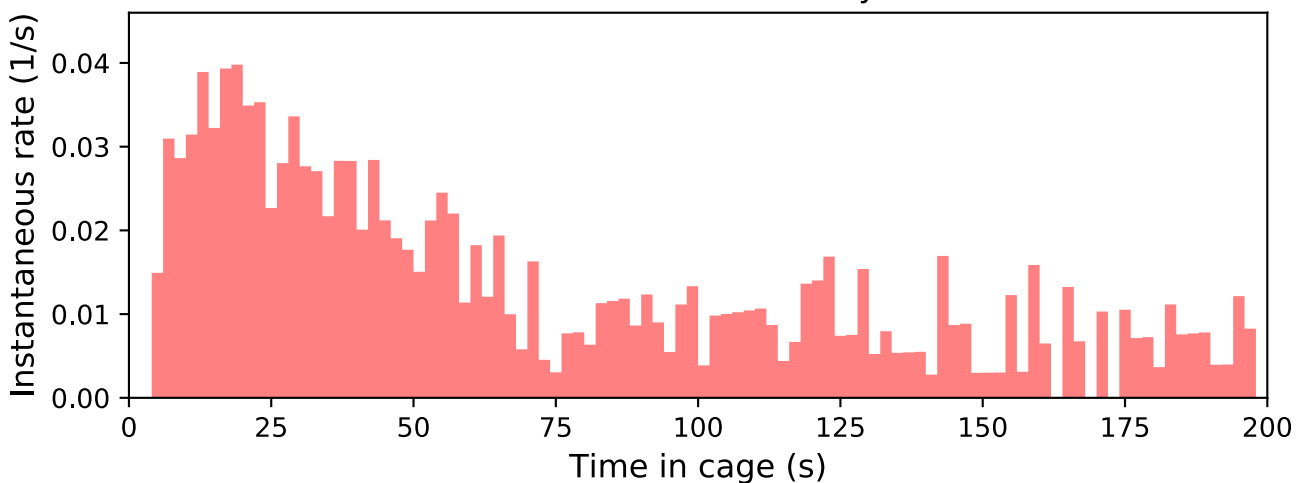**B**

## Exit from the maze

Rewarded animals: Rate of exit from maze

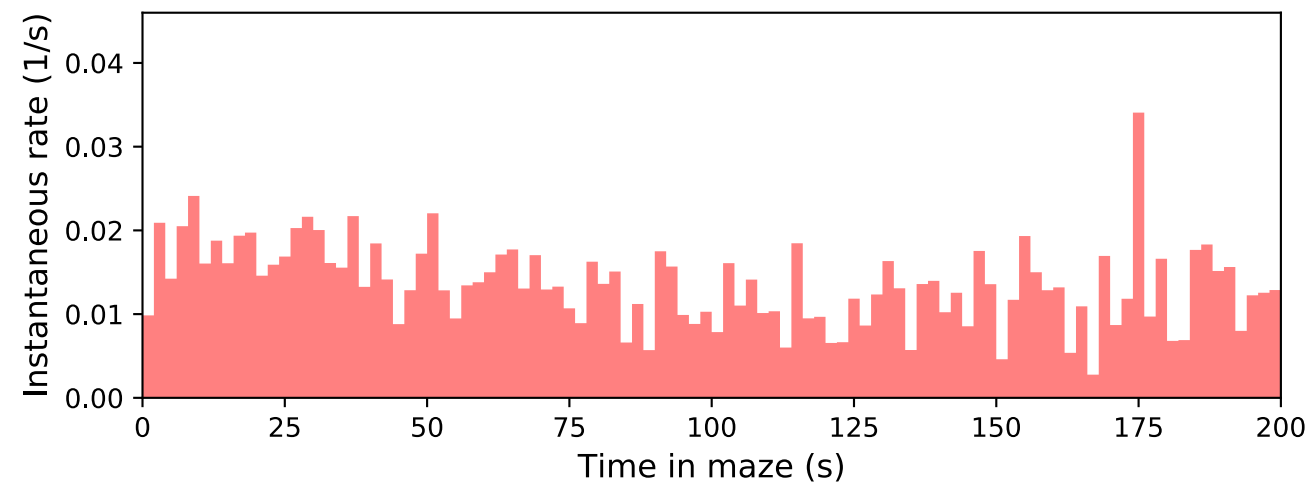

Unrewarded animals: Rate of entry into maze

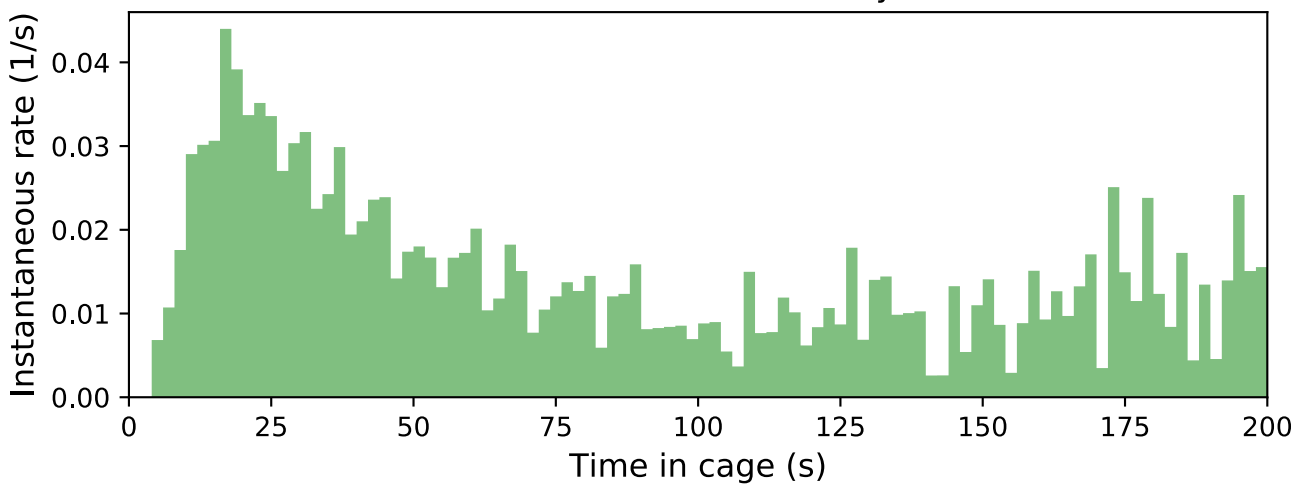

Unrewarded animals: Rate of exit from maze

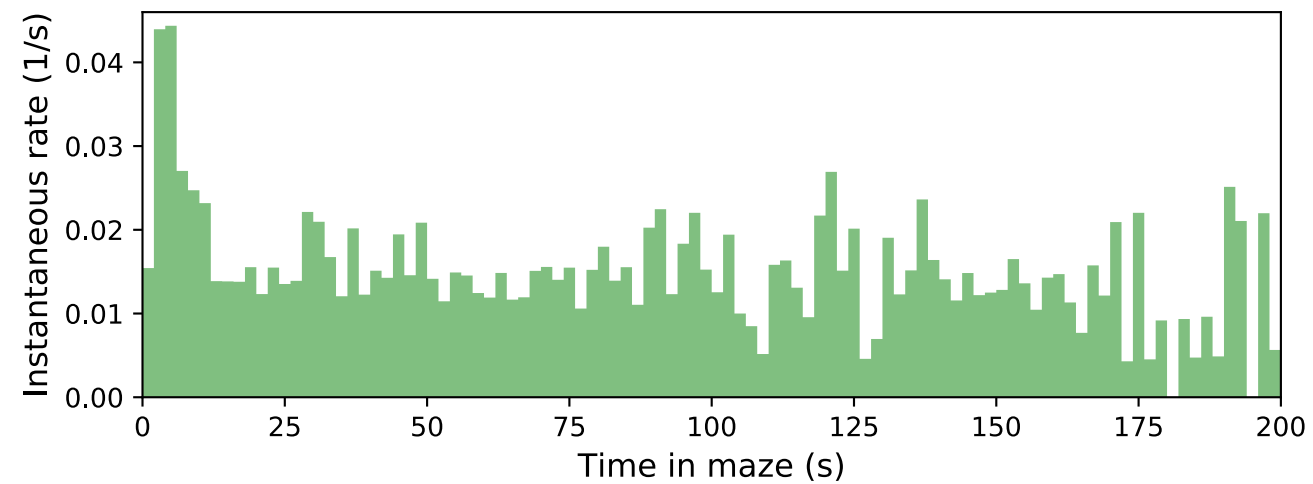

Supplement: supp [file elife-66175-supp-v1.zip]
