# Supplementary figures and images for: Mice in a labyrinth show rapid learning, sudden insight, and efficient exploration
Source: eLife journal article supplement (doi:10.7554/elife.66175), 2021-07-01

**A**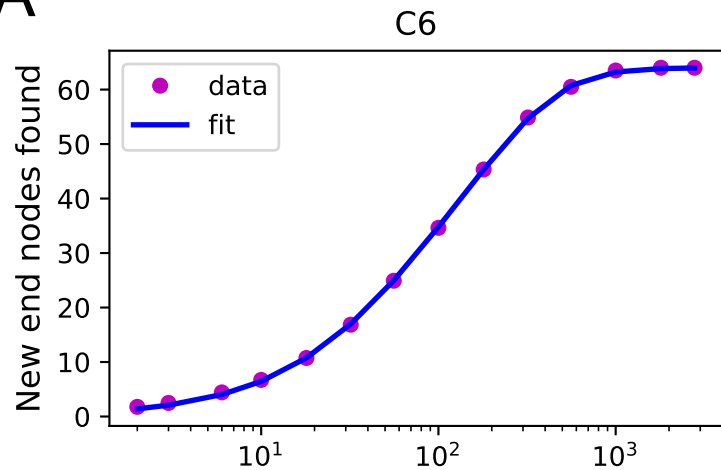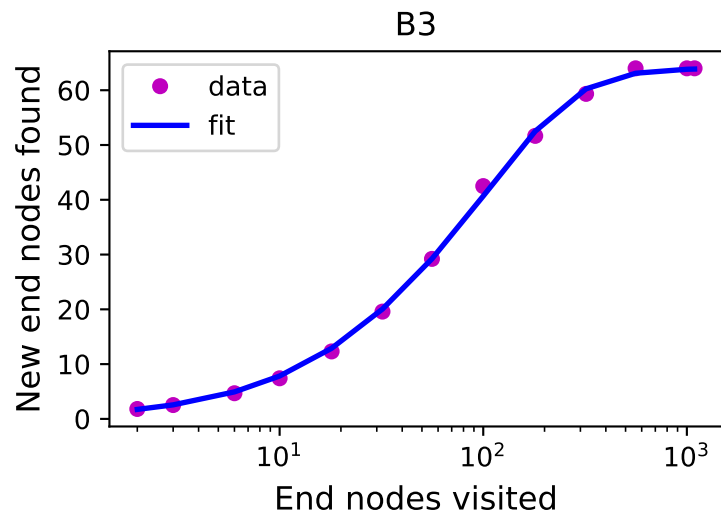**B**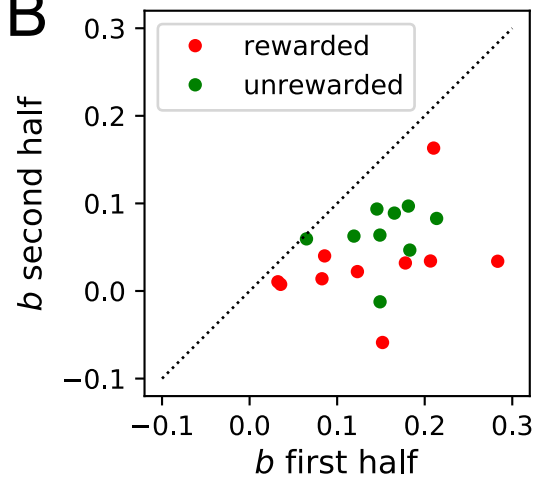**C**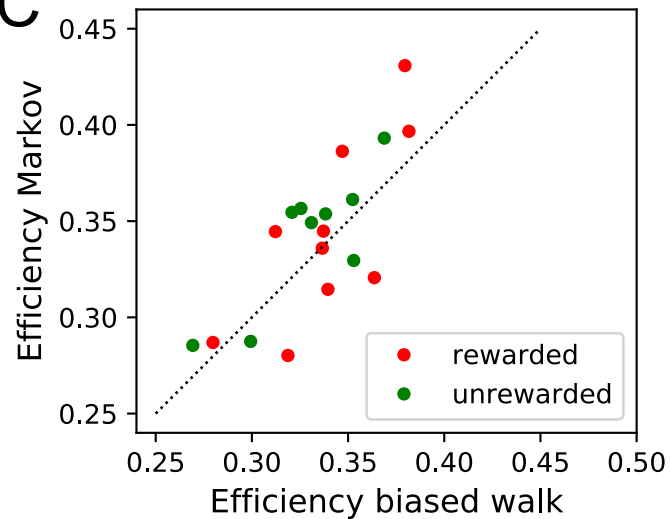

Supplement: supp [file elife-66175-supp-v1.zip]

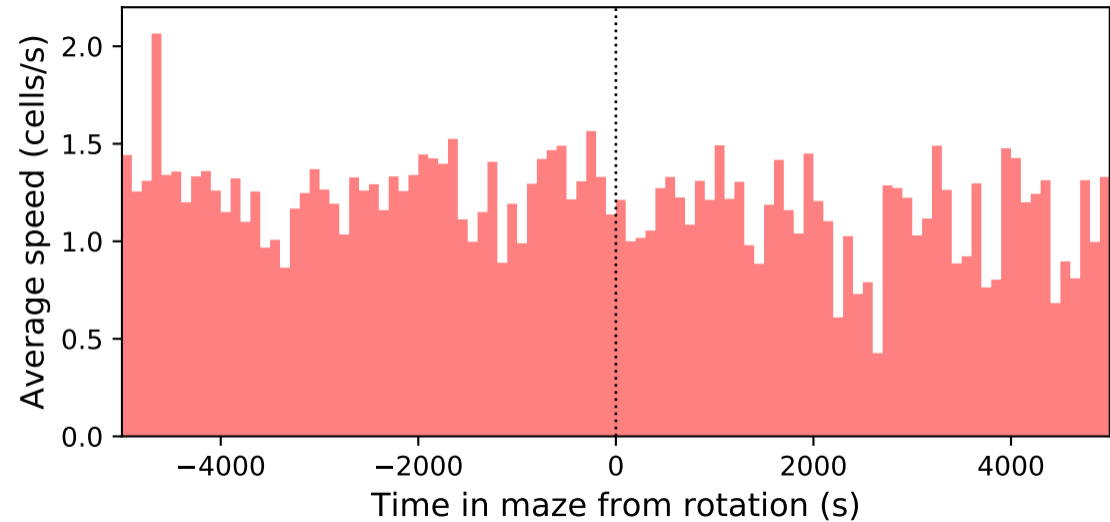

Supplement: supp [file elife-66175-supp-v1.zip]

# Markov chain training vs testing

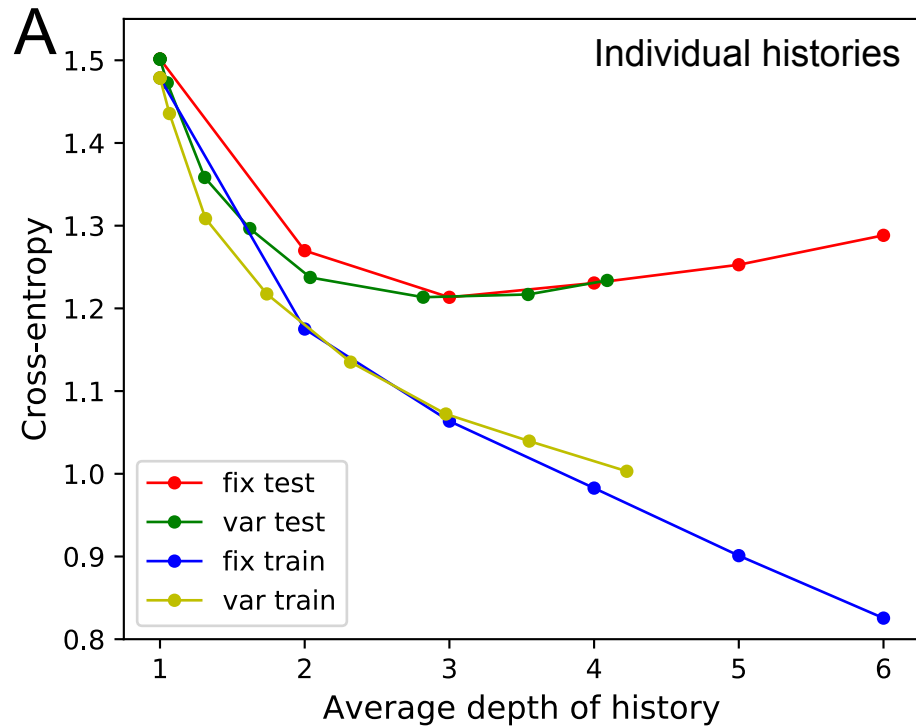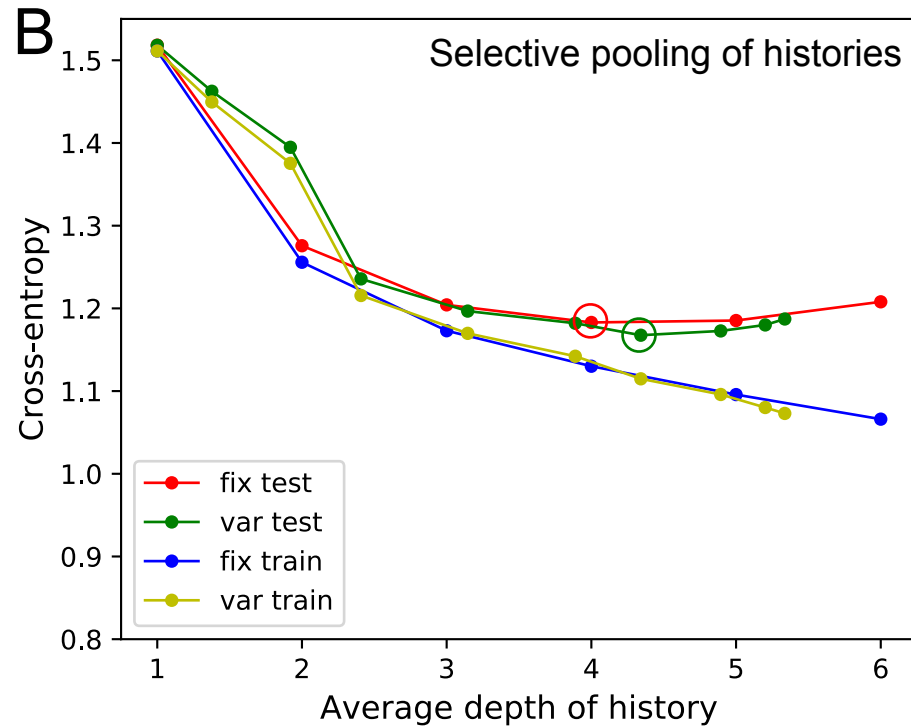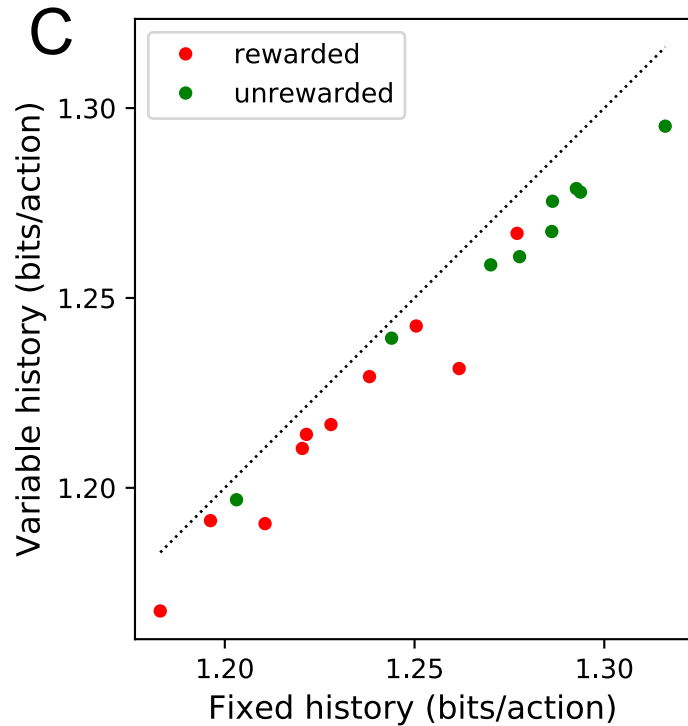

Supplement: supp [file elife-66175-supp-v1.zip]

Number of rewards or long paths

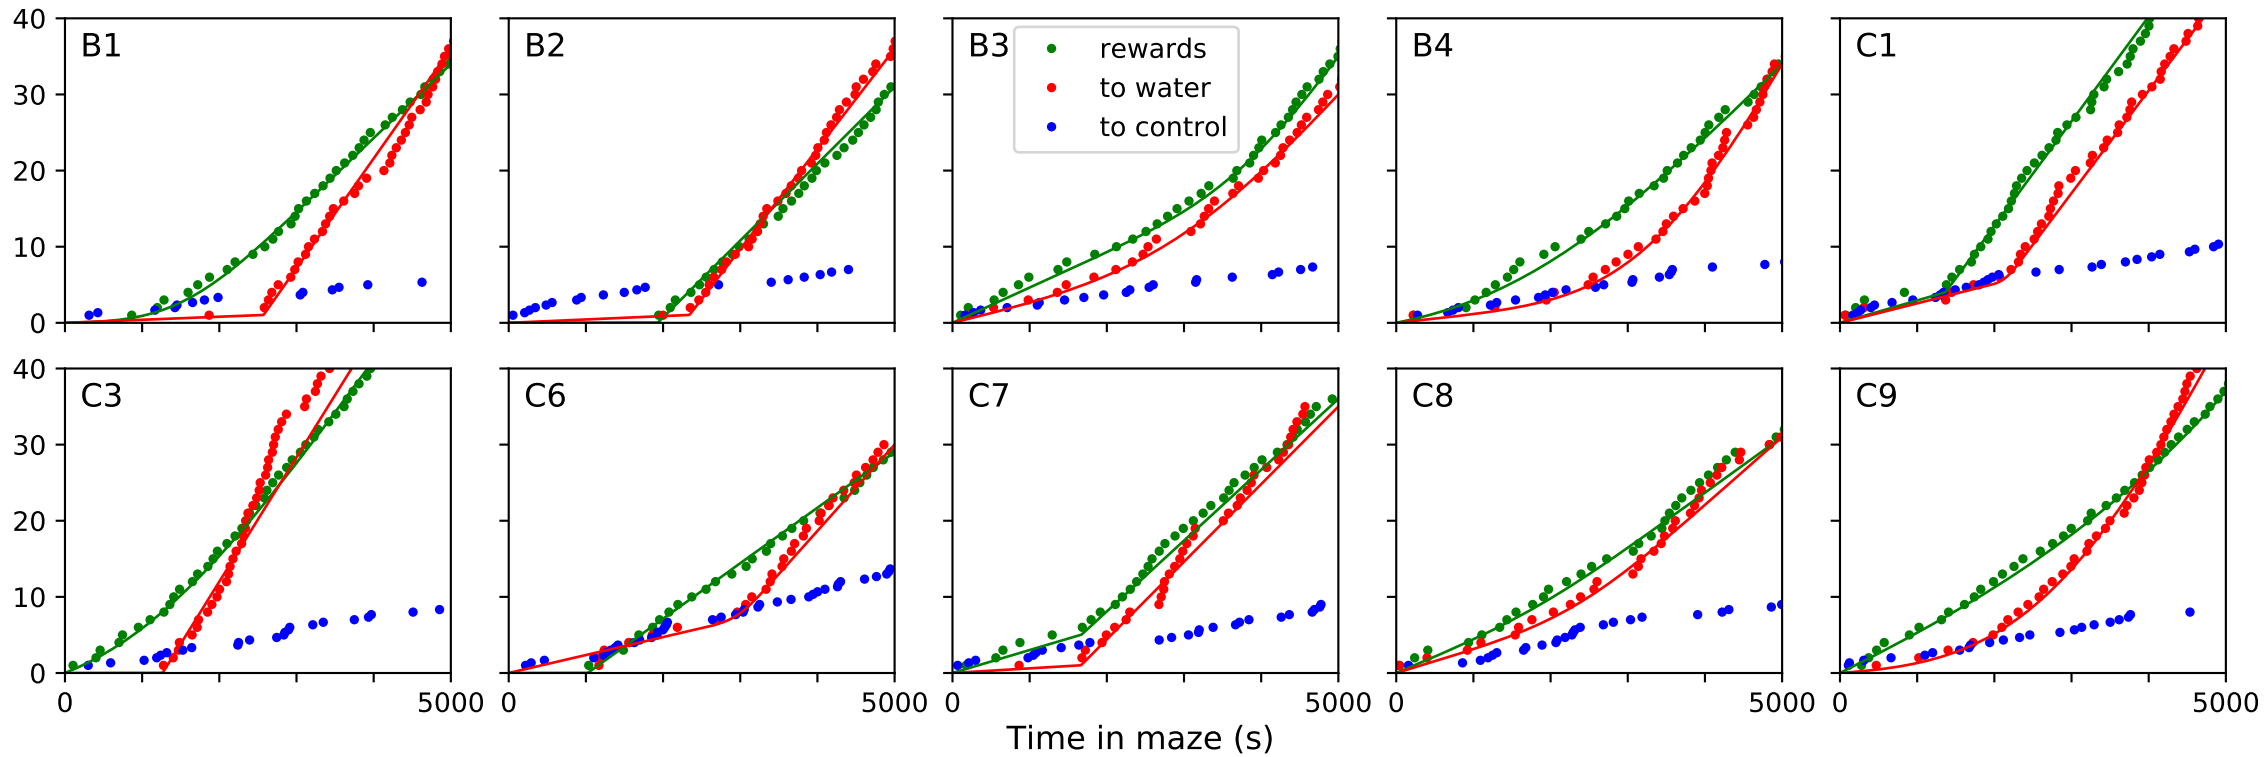

Supplement: supp [file elife-66175-supp-v1.zip]

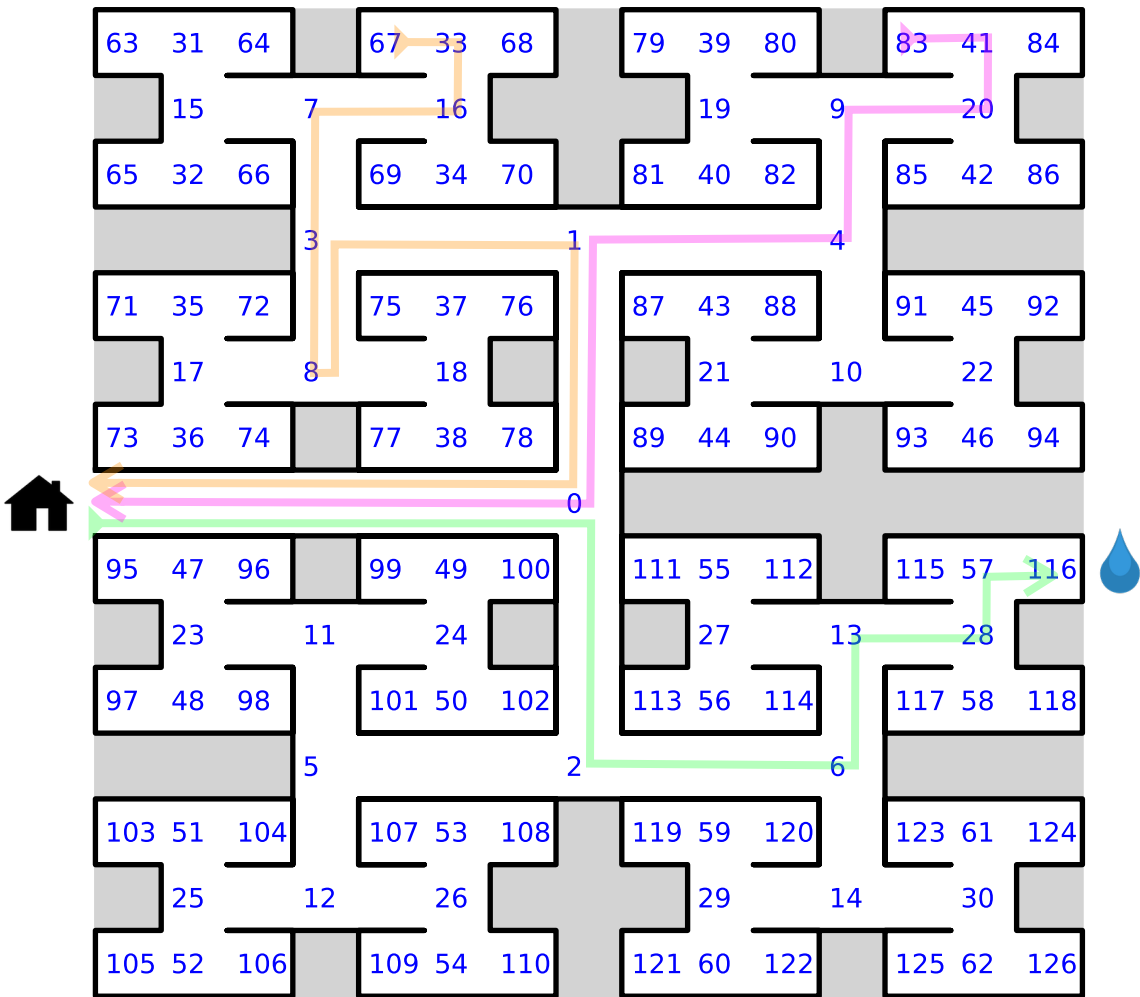

Supplement: supp [file elife-66175-supp-v1.zip]

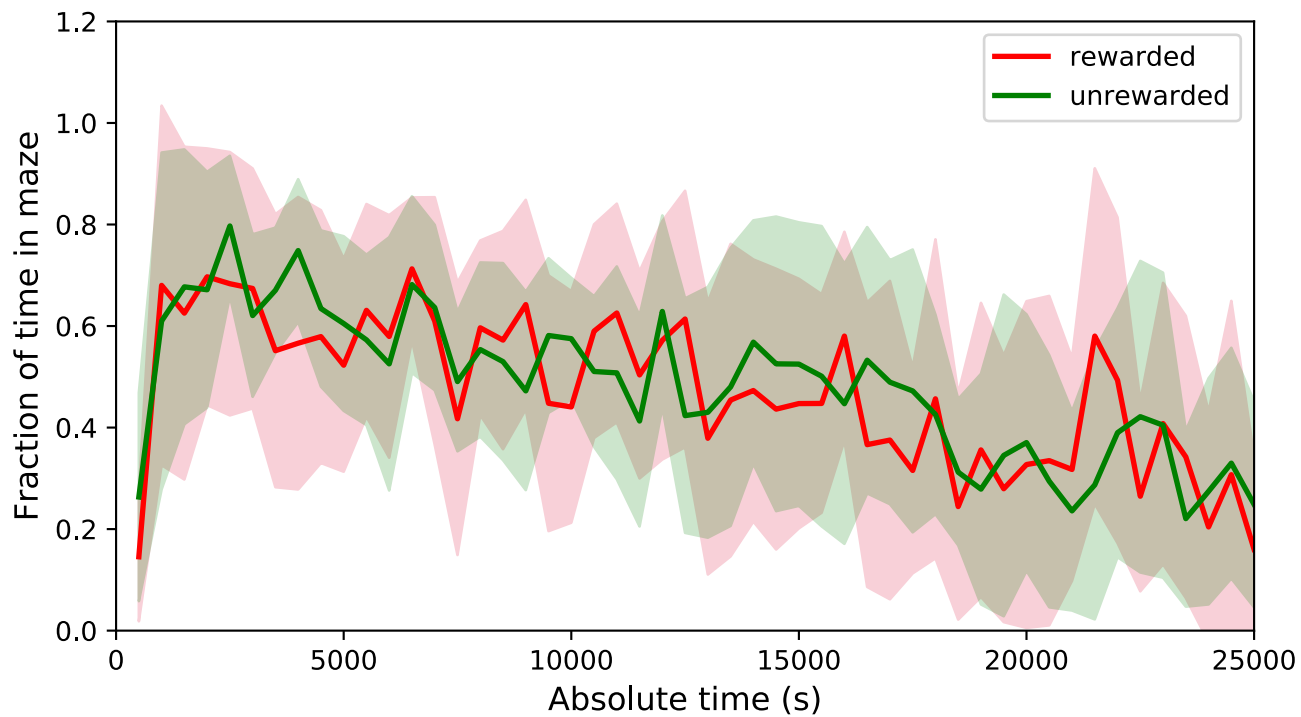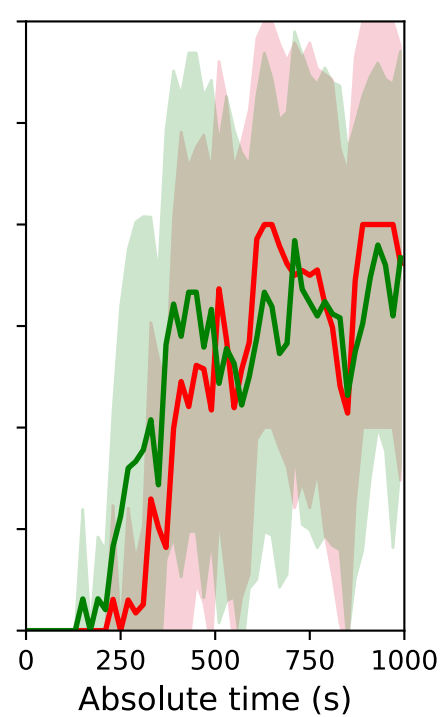

Supplement: supp [file elife-66175-supp-v1.zip]

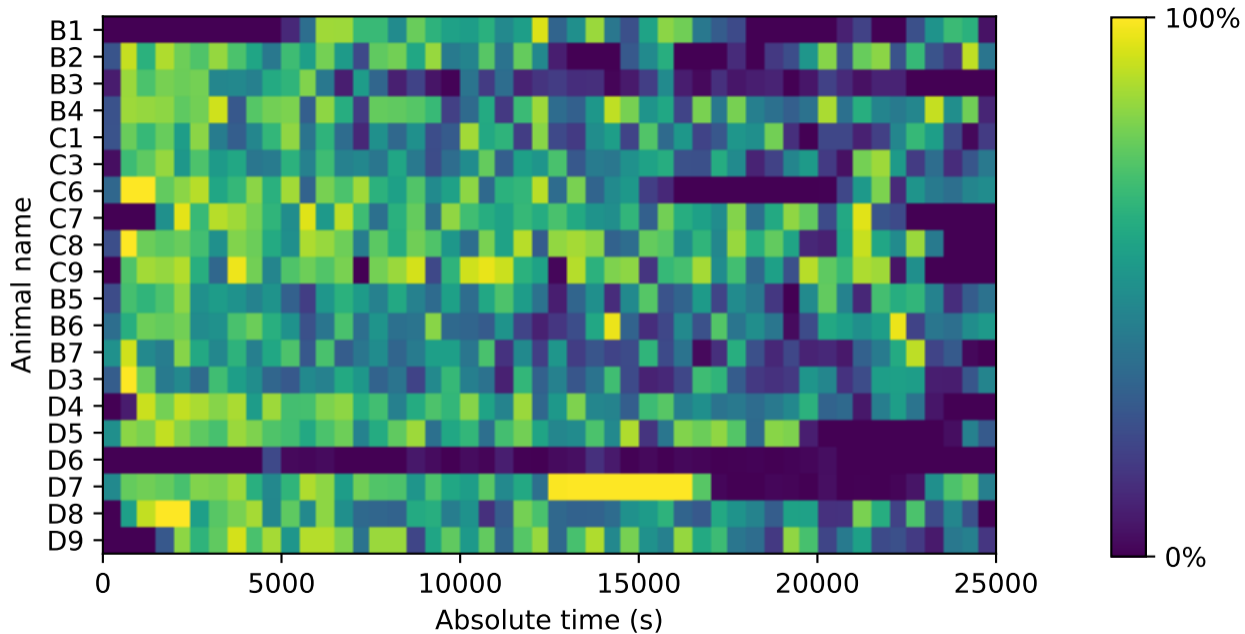

Supplement: supp [file elife-66175-supp-v1.zip]

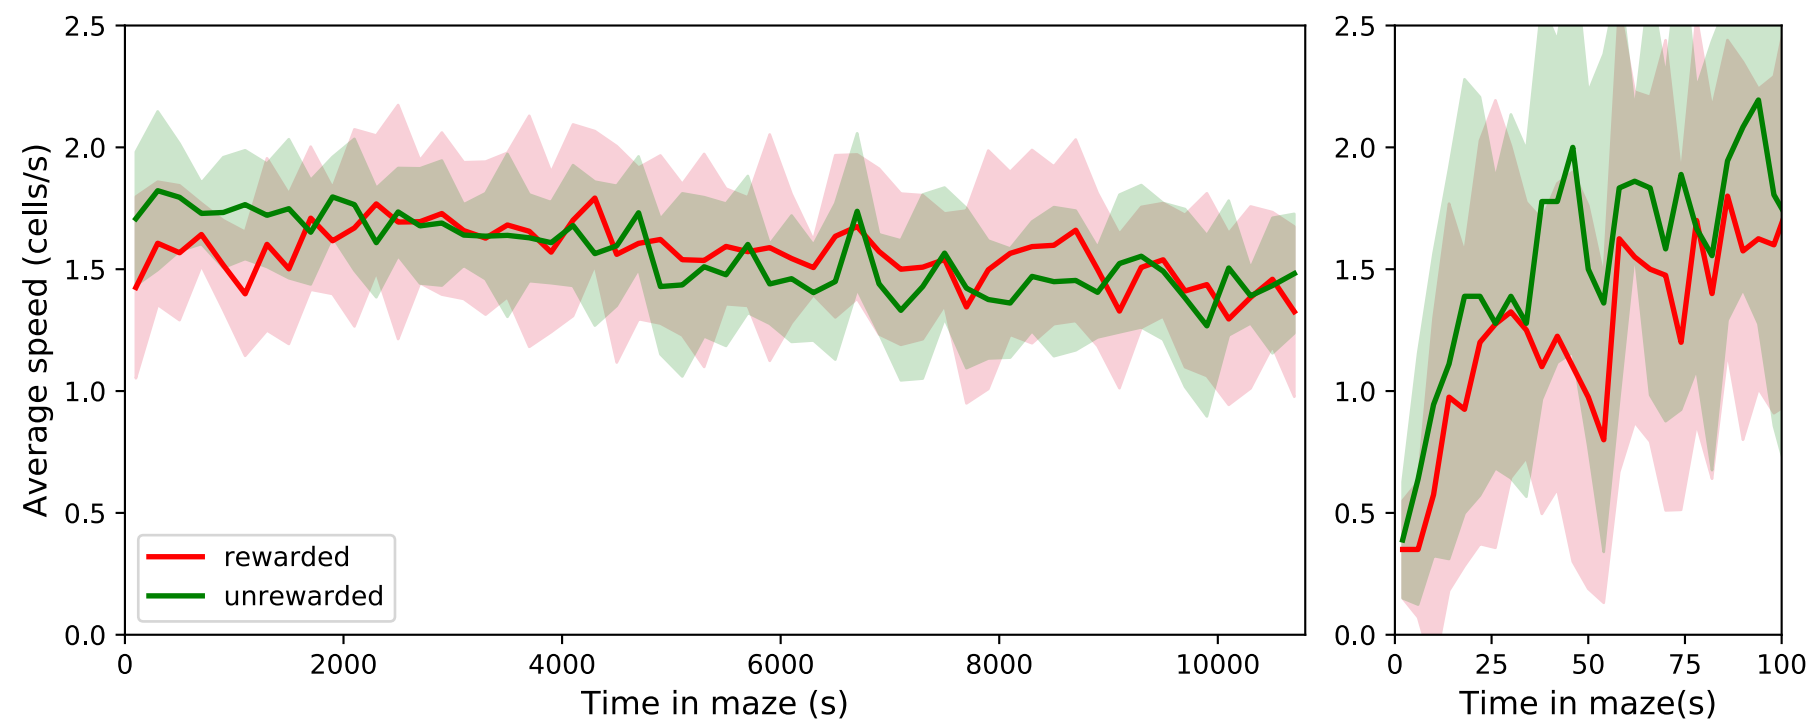

Supplement: supp [file elife-66175-supp-v1.zip]

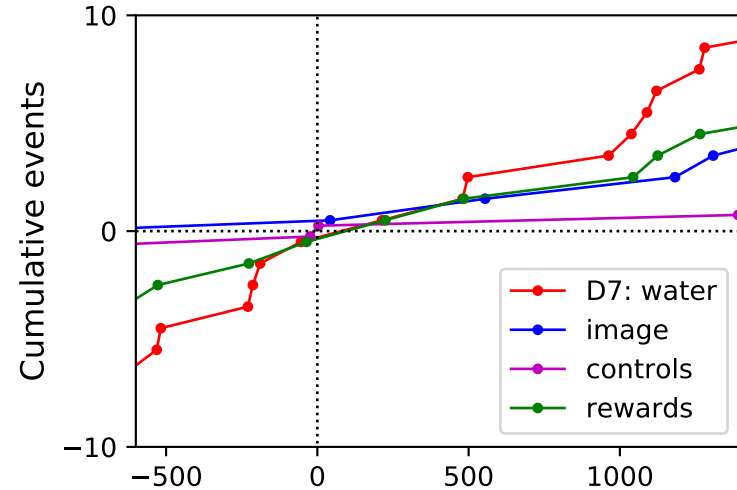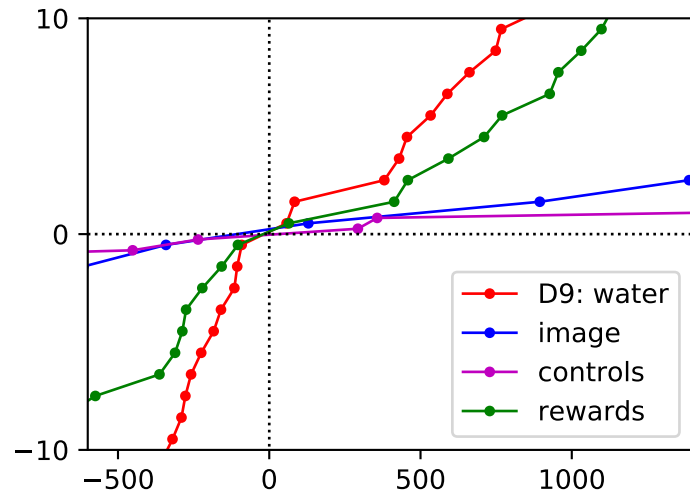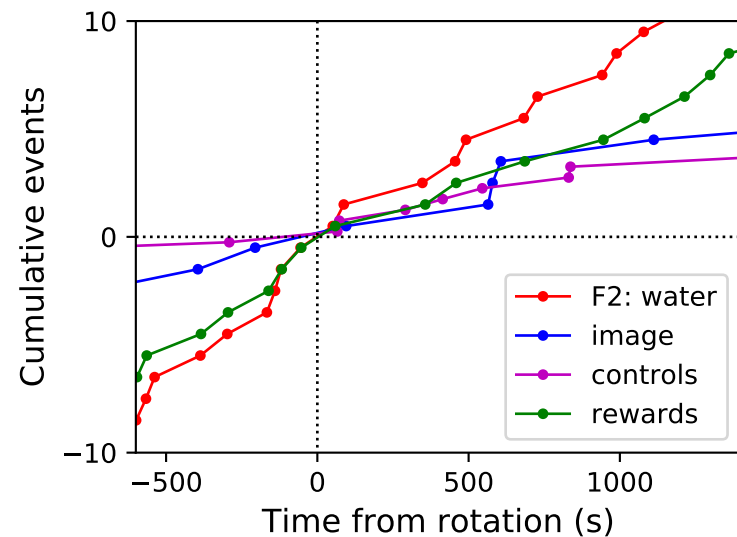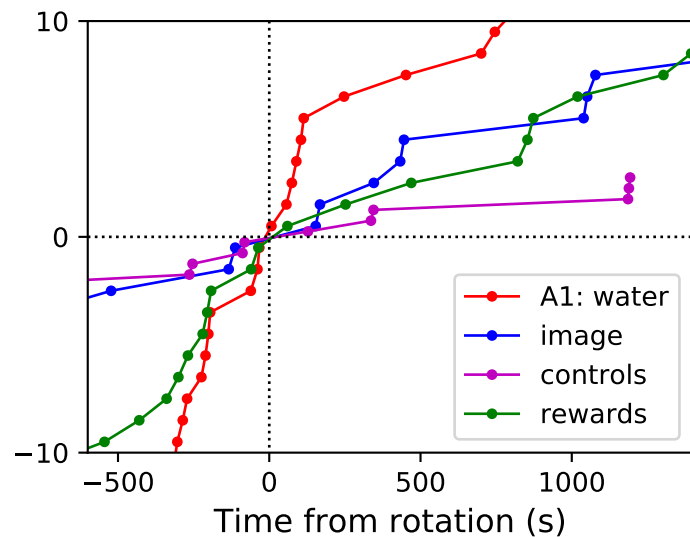

Supplement: supp [file elife-66175-supp-v1.zip]
